# Supplementary material for: Electrochemically triggered rational design of bismuth copper sulfide for wearable all-sulfide semi-solid-state supercapacitor with a wide operational potential window (1.8 V) and ultra-long life
Source: Royal Society of Chemistry journal article supplement (doi:10.1039/d4qi00675e), 2024-01-01
Supplement: d4qi00675e1.pdf [file d4qi00675e1.pdf]

## Supporting Information

### **Electrochemically triggered rational design of bismuth copper sulfide for wearable all-sulfide semi-solid-state supercapacitor with a wide operational potential window (1.8 V) and ultra-long life**

Edugulla Girija Shankar, Bhimanaboina Ramulu, Manchi Nagaraju, and Jae Su Yu\*

Department of Electronics and Information Convergence Engineering, Institute for Wearable Convergence Electronics, Kyung Hee University, 1732 Deogyong-daero, Giheung-gu, Yongin-si, Gyeonggi-do 17104, Republic of Korea

\*Address correspondence to [jsyu@khu.ac.kr](mailto:jsyu@khu.ac.kr)

## S1. Material characterization

To study the surface morphology and elemental mappings of the prepared samples, field-emission scanning electron microscope (FE-SEM, Carl Zeiss) equipped with energy-dispersive X-ray spectroscopy (EDS) analysis was employed, and inductively coupled plasma spectroscopy (ICP, Direct Reading Echelle ICP, LEEMAN) was performed. Intrinsic morphology was investigated by using a transmission electron microscope (TEM). The crystal structure of the prepared samples was investigated using X-ray diffraction (XRD, Mac Science M18XHF-SRA, Cu K $\alpha$  radiation;  $\lambda = 1.5406 \text{ \AA}$ ). The existing oxidation states of elements in the optimized sample were investigated using X-ray photoelectron spectroscopy (XPS, K-alpha (Thermo Electron)) analysis. High-resolution Raman (HR-Raman) spectroscopy (inVia Raman microscope) was performed.

## S2. Calculations

$$C_{ts} = \frac{2I \int v(t) dt}{m \times V} \quad (S1)$$

$$C_s = \frac{I \times \Delta t}{m \times V} \quad (S2)$$

$$P = \frac{E}{\Delta t} \quad (S3)$$

where ' $C_{ts}$ ' is the specific capacity (mAh g<sup>-1</sup>), ' $\int v(t) dt$ ', is an integral area (cm<sup>2</sup>), ' $V$ ' is the potential window (V), ' $C_s$ ' is the specific capacitance (F g<sup>-1</sup>), and 'E' and 'P' are the energy density (Wh kg<sup>-1</sup>) and power density (W kg<sup>-1</sup>), respectively. ' $\Delta t$ ' is referred to as the discharge time (s), ' $m$ ' is referred to as the mass of the active electrode (g), and ' $I$ ' is a current (A).<sup>S1</sup>

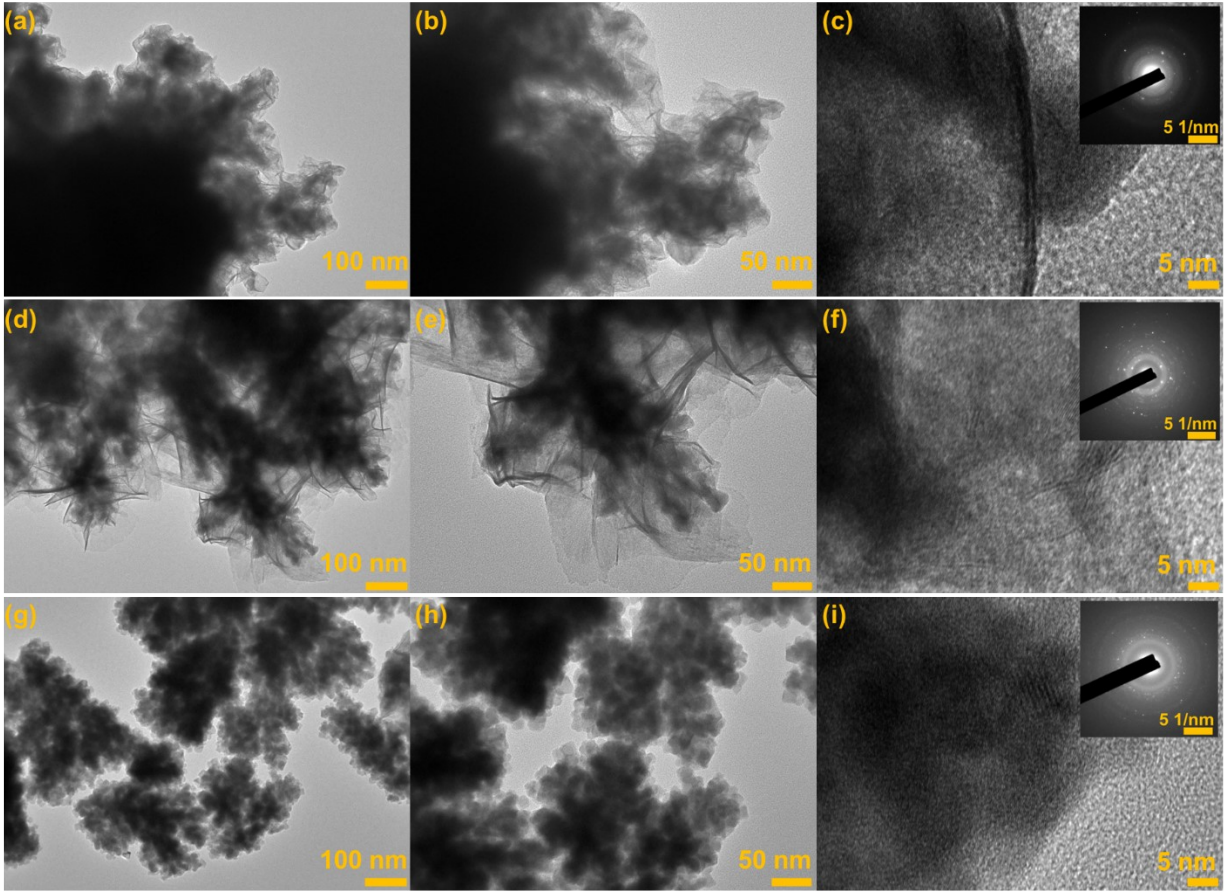

**Fig. S1.** TEM images of the (a-c) BCS-0.5, (d-f) BCS-1, and (g-f) BCS-2. The insets inside the HR-TEM images show the corresponding SAED patterns, respectively.

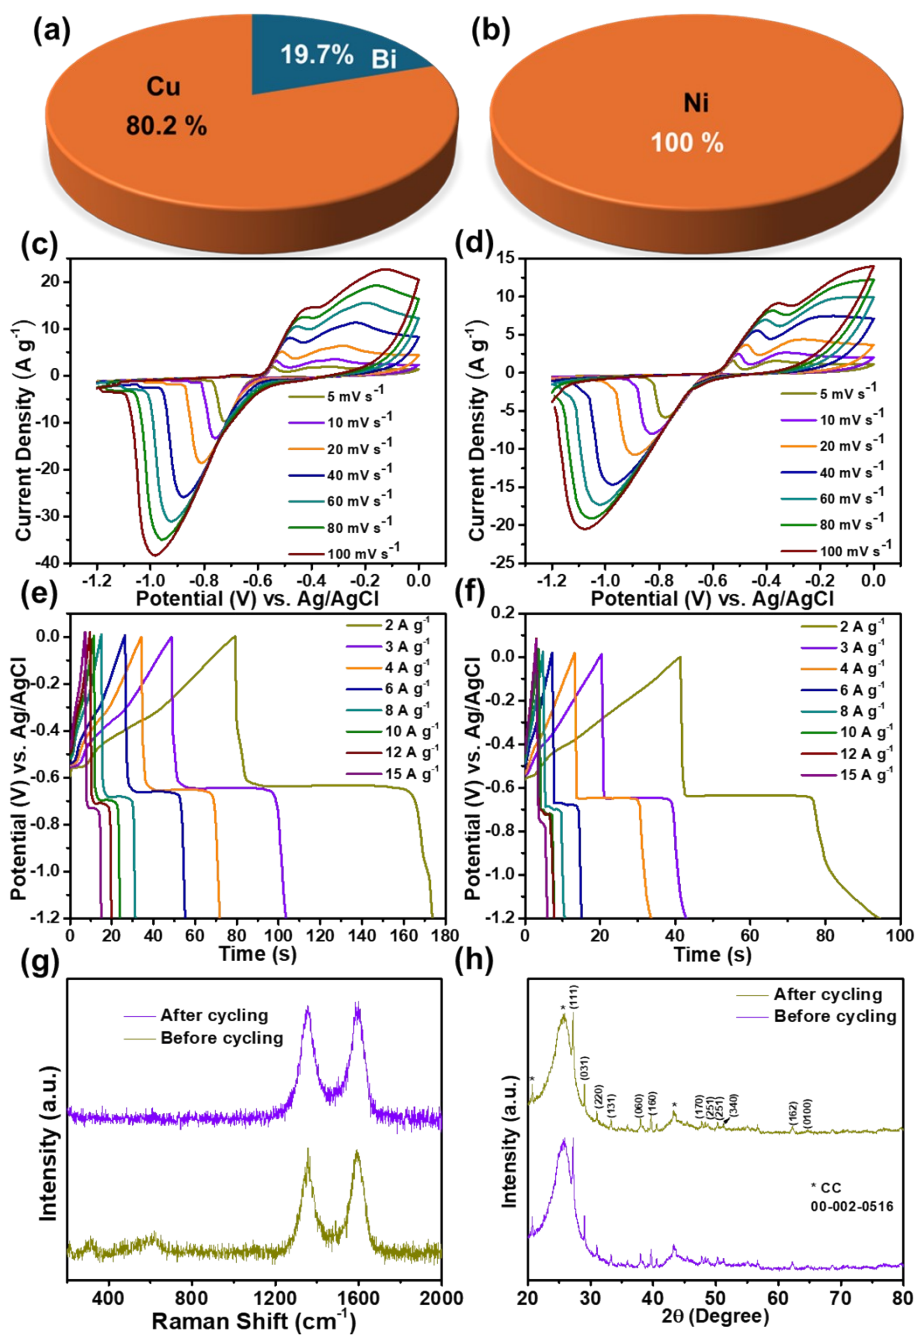

**Fig. S2.** Pie charts of the detected atomic ratio percentages from ICP spectroscopy analysis for the (a) BCS-1 and (b) NS. CV curves at different scan rates for the (c) BCS-0.5 and (d) BCS-2 electrodes. GCD curves at different current densities for the (e) BCS-0.5 and (f) BCS-2 electrodes.

Comparative (g) Raman spectra and (h) XRD patterns of the BCS-1 electrode before and after cycling.

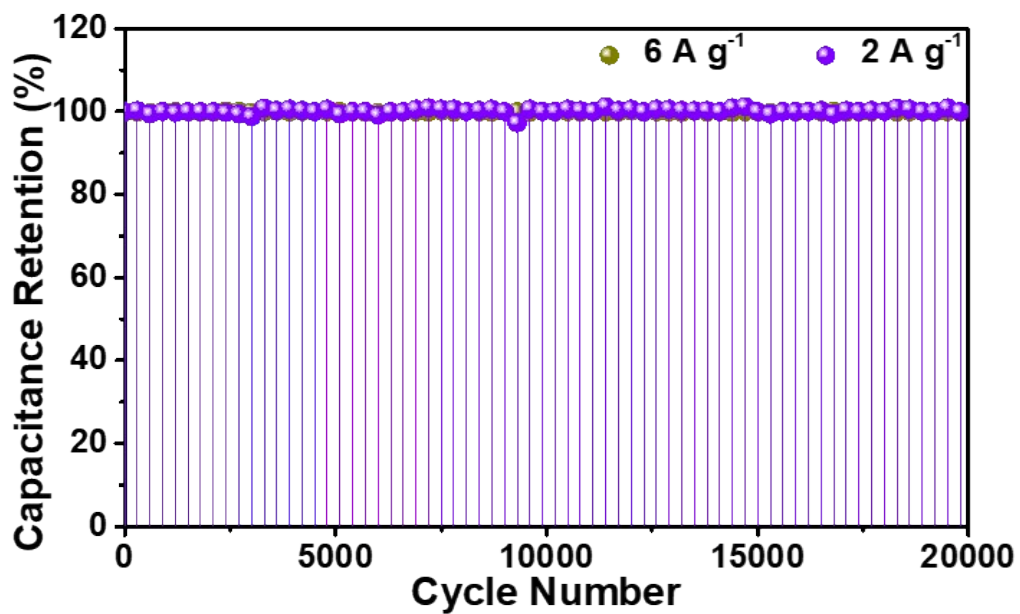

**Fig. S3.** Cycling stability performance of the ASSSC device at 2 and 6 A g<sup>-1</sup>.

## Reference

[S1] M. Nagaraju, S. C. Sekhar, S. J. Arbaz, and J. S. Yu, Solvothermal-derived nanoscale spinel bimetallic oxide particles rationally bridged with conductive vapor-grown carbon fibers for hybrid supercapacitors, *Appl. Surf. Sci.*, 2021, **563**, 150223.
